# Supplementary material for: 3D-printed porous zinc scaffold combined with bioactive serum exosomes promotes bone defect repair in rabbit radius
Source: publisher site journal article supplement (doi:10.18632/aging.205891), 2024-05-31
Supplement: Supplementary file [file aging-v16i11-205891-supplementary-material-SD1.pdf]

## SUPPLEMENTARY FIGURE

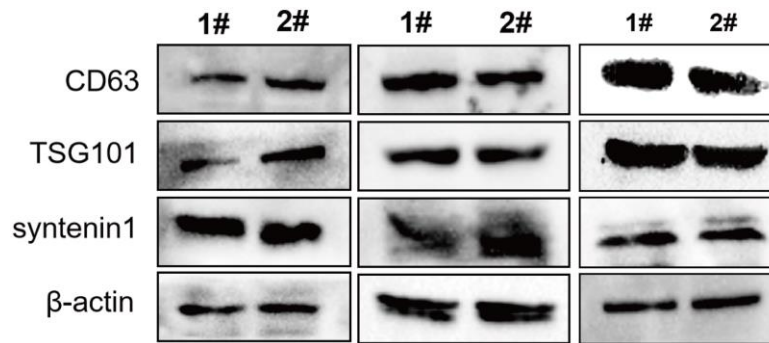

Supplementary Figure 1. Illustrates the protein expression of CD63, TSG101, and syntenin1 in exosomes from the serum of rabbit models with femoral fractures.
